# Supplementary material
Source: MDPI journal article supplement (https://www.mdpi.com/2073-4344/7/7/197)
Supplement: s1 [file s1]

# Supplementary Materials: The Effects of CeO<sub>2</sub> Nanorods and CeO<sub>2</sub> Nanoflakes on Ni–S Alloys in Hydrogen Evolution Reactions in Alkaline Solutions

Meiqin Zhao, Yao Li, Haifeng Dong, Lixin Wang, Zhouhao Chen, Yazhou Wang, Zhiping Li, Meirong Xia and Guangjie Shao

In supergravity field, there is a corresponding acceleration at a certain speed. The acceleration can be calculated by the following formula [1]:

$$a = r\omega^2 = r\left(\frac{2\pi N}{60}\right)^2 = \frac{N^2\pi^2 r}{900} \quad (1)$$

where  $a$  is acceleration (m/s<sup>2</sup>) of the surpergravity filed,  $\omega$  is angular speed (rad/s),  $N$  is speed (rpm),  $r$  is the distance from cathode to axis (5 cm).

When  $N$  is equal to 3000 rpm, the value of  $a$  is 4,929.8 m/s<sup>2</sup>, which is 503.04 times than that of acceleration of gravity, i.e. the field can be called supergravity field.

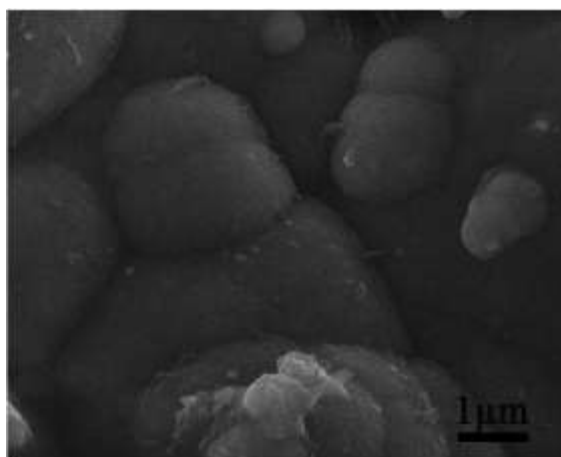

**Figure S1.** SEM image of M-0.

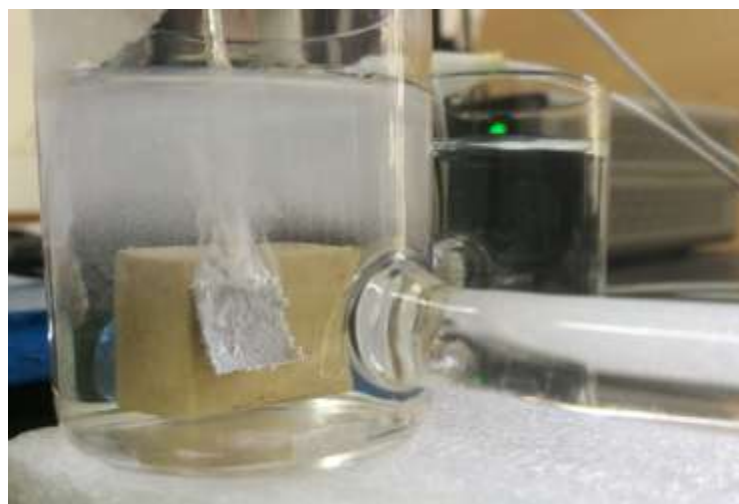

**Figure S2.** Image showing hydrogen evolution with the M-CeO<sub>2</sub>(Nr).

**Table S1. Comparison of HER performance in alkaline media for Ni-S/CeO<sub>2</sub>(Nr) and Ni-S/CeO<sub>2</sub>(Nf) with other non-noble-metal HER electrocatalysts.**

| Catalyst                   | $b/\text{mV dec}^{-1}$ | $j_0/\text{mA cm}^{-2}$ | Test temperature | Solution | Ref.      |
|----------------------------|------------------------|-------------------------|------------------|----------|-----------|
| Ni-CeO <sub>2</sub>        | 146.6                  | 0.338                   | 298K             | 1 M NaOH | [2]       |
| Ni-Zn/CeO <sub>2</sub>     | 146                    | 5.37                    | 298K             | 1 M NaOH | [3]       |
| Ni-S(La)                   | 63.8                   | 5.6                     | 298K             | 28% NaOH | [4]       |
| Ni-S/CeO <sub>2</sub> (Nr) | 163                    | 7.40                    | 298K             | 1 M NaOH | This work |
| Ni-S/CeO <sub>2</sub> (Nf) | 158                    | 7.48                    | 298K             | 1 M NaOH | This work |

**Table S2.** Values of the charge transfer resistance and the mass transfer resistance of four different electrodes.

| Paramater             | M-0   | M-CeO <sub>2</sub> Nr | M-CeO <sub>2</sub> Nf |
|-----------------------|-------|-----------------------|-----------------------|
| $R_{ct}$ ( $\Omega$ ) | 14.55 | 2.81                  | 2.46                  |

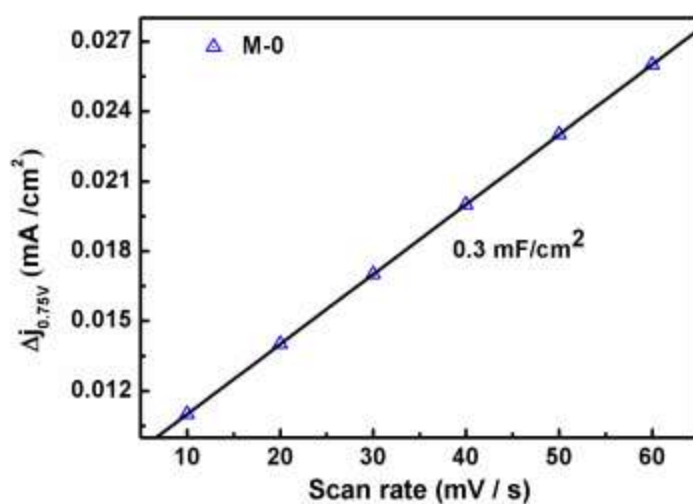

**Figure S3.** Liner fitting of the capacitive current of M-0 vs. scan rates. The selected potential range where no faradic current was tested is 0.025V to 0.125V vs. RHE.

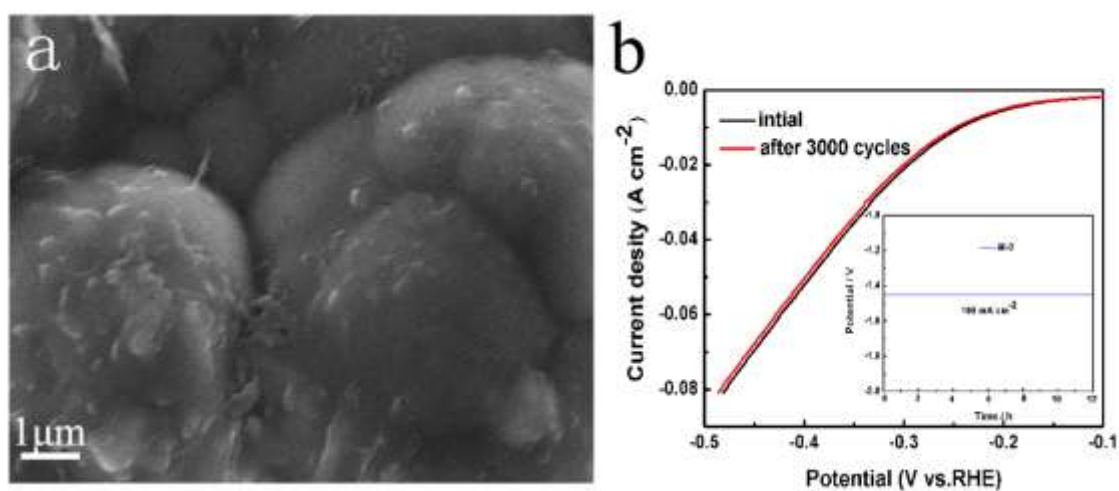

**Figure S4.** (a) SEM of M-0 after 3000 cycles; (b) LSV curves of M-0 before and after 3000 CV cycles at a scan rate of  $100 \text{ mV S}^{-1}$  between  $-0.825$  to  $-1.025 \text{ V}$ . Inset, time dependence of the potential of M-0 at a current density of  $100 \text{ mA cm}^{-2}$ .

## References

1. Du, J.; Shao, G.; Qin, X.; Wang, G.; Zhang, Y.; Ma, Z. High specific surface area  $\text{MnO}_2$  electrodeposited under supergravity field for supercapacitors and its electrochemical properties. *Mater. Lett.* **2012**, *84*, 13–15.
2. Chen, Z.; Shao, G.; Ma, Z.; Song, J.; Wang, G.; Huang, W. Preparation of Ni– $\text{CeO}_2$  composite coatings with high catalytic activity for hydrogen evolution reaction. *Mater. Lett.* **2015**, *160*, 34–37.
3. Chen, Z.; Ma, Z.; Song, J.; Wang, L.; Shao, G. A novel approach for the preparation of Ni– $\text{CeO}_2$  composite cathodes with enhanced electrocatalytic activity. *RSC Adv.* **2016**, *6*, 60806–60814.
4. Ho, C.Y.; Lin, T.H.; Chang, Y.J. Influence of various annealed Ni–Co nanowire properties upon the capability of immobilization of histidine-tagged protein. *J. Alloy. & Compd.* **2015**, *648*, 726–731.
