# Supplementary material
Source: MDPI journal article supplement (https://www.mdpi.com/2073-4344/7/7/197)
Supplement: s1 [file s1]

Archive with 2 entries (2 files):
- catalysts-198321-supplementary.avi
- catalysts-198321-supplementary.pdf
